# Supplementary material for: Vibrational and coherence dynamics of molecules
Source: Royal Society of Chemistry journal article supplement (doi:10.1039/c5cp03623b), 2015-01-01
Supplement: c5cp03623b1.pdf [file c5cp03623b1.pdf]

## Vibrational and coherence dynamics in molecules: Supplementary Information

Zhedong Zhang<sup>1</sup> and Jin Wang<sup>1,2,3</sup>

<sup>1</sup>*Department of Physics and Astronomy, SUNY Stony Brook, Stony Brook, NY 11794, USA*

<sup>2</sup>*Department of Chemistry, SUNY Stony Brook, Stony Brook, NY 11794, USA and*

<sup>3</sup>*State Key Laboratory of Electroanalytical Chemistry, Changchun Institute of Applied Chemistry, Chinese Academy of Sciences, Changchun, Jilin 130022, P. R. China*

(Dated: August 4, 2015)

### I. DERIVATION OF QUANTUM MASTER EQUATION

To derive the operator master equation in Eq.(2) in main text, we first need to diagonalize the system Hamiltonian by Bogoliubov transform:  $H_s = E_1\eta_1^\dagger\eta_1 + E_2\eta_2^\dagger\eta_2$  where

$$\begin{pmatrix} a_1 \\ a_2 \end{pmatrix} = \begin{pmatrix} \cos\theta & -\sin\theta \\ \sin\theta & \cos\theta \end{pmatrix} \begin{pmatrix} \eta_1 \\ \eta_2 \end{pmatrix}, \quad U = \begin{pmatrix} \cos\theta & -\sin\theta \\ \sin\theta & \cos\theta \end{pmatrix} \quad (1)$$

and the mixture angle

$$\theta = \frac{1}{2}\tan^{-1}\left(\frac{2\Delta}{\varepsilon_1 - \varepsilon_2}\right), \quad \frac{\pi}{2} < \theta < \frac{3\pi}{4} \quad (2)$$

thus the interaction to  $T_1$ -bath is

$$H_{int}^{(1)} = (-i) \sum_{i=1}^2 \sum_{\nu=1}^2 (U_{i\nu}\eta_\nu - U_{\nu i}^\dagger\eta_\nu^\dagger) \otimes B = \sum_{i=1}^2 \sum_{\nu=1}^2 \sum_{\omega_\nu} A_{i\nu}(\omega_\nu) \otimes B \quad (3)$$

$$B = i \sum_{\mathbf{k}, \sigma} g_{\mathbf{k}\sigma} \left( b_{\mathbf{k}\sigma}^{(1)} e^{i\mathbf{k}\cdot\mathbf{r}} - b_{\mathbf{k}\sigma}^{(1),\dagger} e^{-i\mathbf{k}\cdot\mathbf{r}} \right)$$

where the operator  $A_{i\nu}(\omega_\nu)$  takes the form of

$$A_{i\nu}(\omega_\nu > 0) = -iU_{i\nu}\eta_\nu, \quad A_{i\nu}^\dagger(\omega_\nu > 0) = iU_{\nu i}^\dagger\eta_\nu^\dagger \quad (4)$$

$$A_{i\nu}(\omega_\nu < 0) = iU_{\nu i}^\dagger\eta_\nu^\dagger, \quad A_{i\nu}^\dagger(\omega_\nu < 0) = -iU_{i\nu}\eta_\nu$$

Switching into interaction picture, the interaction reads

$$\tilde{H}_{int}^{(1)}(t) = \sum_{i=1}^2 \sum_{\nu=1}^2 \sum_{\omega_\nu} A_{i\nu}(\omega_\nu) e^{-i\omega_\nu t} \otimes B(t) \quad (5)$$

$$B(t) = i \sum_{\mathbf{k}, \sigma} g_{\mathbf{k}\sigma} \left[ b_{\mathbf{k}\sigma}^{(1)} e^{i(\mathbf{k}\cdot\mathbf{r} - \omega_{\mathbf{k}\sigma} t)} - b_{\mathbf{k}\sigma}^{(1),\dagger} e^{-i(\mathbf{k}\cdot\mathbf{r} - \omega_{\mathbf{k}\sigma} t)} \right]$$

and subsequently the correlation function of the environment can be obtained

$$\langle B(t)B(t-s) \rangle = \sum_{\mathbf{k}, \sigma} g_{\mathbf{k}\sigma}^2 \left[ n_{\mathbf{k}\sigma} e^{i\omega_{\mathbf{k}\sigma} s} + (n_{\mathbf{k}\sigma} + 1) e^{-i\omega_{\mathbf{k}\sigma} s} \right] \quad (6)$$

As is known, the general form of the dynamical equation of density matrix up to the 2nd order of system-bath interaction is

$$\frac{d\rho_s}{dt} = \frac{i}{\hbar} [\rho_s, H_s] - \frac{1}{\hbar^2} e^{-iH_s t/\hbar} \text{Tr}_R \int_0^t ds [\tilde{H}_{int}(s), [\tilde{H}_{int}(t), \tilde{\rho}_s(t) \otimes \rho_R(0)]] e^{iH_s t/\hbar} \quad (7)$$

which, in terms of Eq.(4) gives the dissipation term contributed by the  $T_1$ -bath

$$\begin{aligned}
D^{(1)}(\rho_s) &= \frac{1}{\hbar^2} \text{Tr}_R \int_0^t \left( \tilde{H}_{int}^{(1)}(t-s) \tilde{\rho}_s(t) \rho_R \tilde{H}_{int}^{(1)}(t) - \tilde{H}_{int}^{(1)}(t) \tilde{H}_{int}^{(1)}(t-s) \tilde{\rho}_s(t) \rho_R \right) ds + \text{h.c.} \\
&= \sum_{i,j=1}^2 \sum_{\nu,\mu=1}^2 \sum_{\omega_\nu, \omega_\mu} e^{i(\omega_\mu - \omega_\nu)t} \left[ A_{i\nu}(\omega_\nu) \rho_s(t) A_{j\mu}^\dagger(\omega_\mu) - A_{j\mu}^\dagger(\omega_\mu) A_{i\nu}(\omega_\nu) \rho_s(t) \right] \times \int_0^t e^{i\omega_\nu s} \langle B(t) B(t-s) \rangle ds + \text{h.c.} \\
&= \frac{1}{\hbar^2} \sum_{i,j=1}^2 \sum_{\nu,\mu=1}^2 \sum_{\omega_\nu} \sum_{\omega_\mu} e^{i(\omega_\mu - \omega_\nu)t} \Gamma^1(\omega_\nu) \left[ A_{i\nu}(\omega_\nu) \rho_s(t) A_{j\mu}^\dagger(\omega_\mu) - A_{j\mu}^\dagger(\omega_\mu) A_{i\nu}(\omega_\nu) \rho_s(t) \right] + \text{h.c.}
\end{aligned} \tag{8}$$

where

$$\Gamma^1(\omega_\nu) = \int_0^t e^{i\omega_\nu s} \langle B(t) B(t-s) \rangle ds = \begin{cases} \pi \sum_{\mathbf{k}, \sigma} g_{\mathbf{k}\sigma}^2 n_{\mathbf{k}\sigma}^{T_1} \delta(\omega_\nu + \omega_{\mathbf{k}\sigma}) = \hbar^2 \gamma n_{\nu}^{T_1}, & \text{when } \omega_\nu < 0 \\ \pi \sum_{\mathbf{k}, \sigma} g_{\mathbf{k}\sigma}^2 (n_{\mathbf{k}\sigma}^{T_1} + 1) \delta(\omega_\nu - \omega_{\mathbf{k}\sigma}) = \hbar^2 \gamma (n_{\nu}^{T_1} + 1), & \text{when } \omega_\nu > 0 \end{cases} \tag{9}$$

Notice that  $\gamma = \pi g_{\bar{\nu}}^2 D_{\bar{\nu}} / \hbar^2$ ,  $D_{\bar{\nu}}$  is the density of states (DOS) and the summation over wave vector was replaced by the integral in frequency domain

$$\sum_{\mathbf{k}, \sigma} \longrightarrow \int D(\omega_{\mathbf{k}\sigma}) d\omega_{\mathbf{k}\sigma} \tag{10}$$

Under the rotating-wave approximation (RWA), the dissipation term in Schrödinger picture then reads

$$\begin{aligned}
D^{(1)}(\rho_s) &= \frac{1}{\hbar^2} \sum_{i,j=1}^2 \sum_{\nu,\mu=1}^2 \left\{ \Gamma^1(\omega_\nu > 0) U_{i\nu} U_{j\mu}^\dagger [\eta_\nu \rho_s(t) \eta_\mu^\dagger - \eta_\mu^\dagger \eta_\nu \rho_s(t)] \right. \\
&\quad \left. + \Gamma^1(\omega_\nu < 0) U_{\nu i}^\dagger U_{j\mu} [\eta_\nu^\dagger \rho_s(t) \eta_\mu - \eta_\mu \eta_\nu^\dagger \rho_s(t)] \right\} + \text{h.c.} \\
&= \sum_{j=1}^2 \sum_{p=1}^2 \left[ \gamma_p^{T_1,+} \left( a_p \rho_s(t) a_j^\dagger - a_j^\dagger a_p \rho_s(t) \right) + \gamma_p^{T_1,-} \left( a_p^\dagger \rho_s(t) a_j - a_j a_p^\dagger \rho_s(t) \right) \right] + \text{h.c.}
\end{aligned} \tag{11}$$

For the interaction to  $T_2$ -bath

$$\begin{aligned}
H_{int}^{(2)} &= (-i) \sum_{\nu=1}^2 \left( U_{2\nu} \eta_\nu - U_{\nu 2}^\dagger \eta_\nu^\dagger \right) \otimes C = \sum_{\nu=1}^2 \sum_{\omega_\nu} A_{2\nu}(\omega_\nu) \otimes C \\
C &= i \sum_{\mathbf{q}, s} f_{\mathbf{q}s} \left( b_{\mathbf{q}s}^{(2)} e^{i\mathbf{q}\cdot\mathbf{r}} - b_{\mathbf{q}s}^{(2)\dagger} e^{-i\mathbf{q}\cdot\mathbf{r}} \right)
\end{aligned} \tag{12}$$

the procedures are similar as that for radiations and thus we omit the details to avoid redundancy. The dissipation term induced by  $T_2$ -bath then is of the form

$$D^{(2)}(\rho_s) = \sum_{p=1}^2 \left[ \gamma_p^{T_2,+} \left( a_p \rho_s(t) a_2^\dagger - a_2^\dagger a_p \rho_s(t) \right) + \gamma_p^{T_2,-} \left( a_p^\dagger \rho_s(t) a_2 - a_2 a_p^\dagger \rho_s(t) \right) \right] + \text{h.c.} \tag{13}$$

therefore the whole dissipation term contributed by environments reads

$$\begin{aligned}
D(\rho_s) &= D^{(1)}(\rho_s) + D^{(2)}(\rho_s) \\
&= \sum_{j=1}^2 \sum_{p=1}^2 \left[ \gamma_p^{T_1,+} \left( a_p \rho_s(t) a_j^\dagger - a_j^\dagger a_p \rho_s(t) \right) + \gamma_p^{T_1,-} \left( a_p^\dagger \rho_s(t) a_j - a_j a_p^\dagger \rho_s(t) \right) \right] \\
&\quad + \sum_{p=1}^2 \left[ \gamma_p^{T_2,+} \left( a_p \rho_s(t) a_2^\dagger - a_2^\dagger a_p \rho_s(t) \right) + \gamma_p^{T_2,-} \left( a_p^\dagger \rho_s(t) a_2 - a_2 a_p^\dagger \rho_s(t) \right) \right] + \text{h.c.}
\end{aligned} \tag{14}$$

which gives the expression in Eq.(2) in main text. The expressions of dissipation rates in Eq.(13) are

$$\begin{aligned}
\gamma_1^{T_1,+} &= \gamma \hbar^2 [n_{\nu_1}^{T_1} \cos^2 \theta + n_{\nu_2}^{T_1} \sin^2 \theta + 1 + (n_{\nu_1}^{T_1} - n_{\nu_2}^{T_1}) \sin \theta \cos \theta] \\
\gamma_2^{T_1,+} &= \gamma \hbar^2 [n_{\nu_1}^{T_1} \sin^2 \theta + n_{\nu_2}^{T_1} \cos^2 \theta + 1 + (n_{\nu_1}^{T_1} - n_{\nu_2}^{T_1}) \sin \theta \cos \theta] \\
\gamma_1^{T_1,-} &= \gamma \hbar^2 [n_{\nu_1}^{T_1} \cos^2 \theta + n_{\nu_2}^{T_1} \sin^2 \theta + (n_{\nu_1}^{T_1} - n_{\nu_2}^{T_1}) \sin \theta \cos \theta] \\
\gamma_2^{T_1,-} &= \gamma \hbar^2 [n_{\nu_1}^{T_1} \sin^2 \theta + n_{\nu_2}^{T_1} \cos^2 \theta + (n_{\nu_1}^{T_1} - n_{\nu_2}^{T_1}) \sin \theta \cos \theta] \\
\gamma_1^{T_2,+} &= \gamma \hbar^2 (n_{\nu_1}^{T_2} - n_{\nu_2}^{T_2}) \sin \theta \cos \theta, \quad \gamma_2^{T_2,+} = \gamma \hbar^2 (n_{\nu_1}^{T_2} \sin^2 \theta + n_{\nu_2}^{T_2} \cos^2 \theta + 1) \\
\gamma_1^{T_2,-} &= \gamma \hbar^2 (n_{\nu_1}^{T_2} - n_{\nu_2}^{T_2}) \sin \theta \cos \theta, \quad \gamma_2^{T_2,-} = \gamma \hbar^2 (n_{\nu_1}^{T_2} \sin^2 \theta + n_{\nu_2}^{T_2} \cos^2 \theta)
\end{aligned} \tag{15}$$

## II. SOLVING THE DYNAMICAL EQUATION IN COHERENT SPACE

To solve the PDE in Eq.(5) in main text, we first calculate the biorthogonal eigenvectors of the drift matrix  $\Sigma$  and the results are

$$\begin{aligned}
\lambda_1 &= \frac{1}{2} [\gamma(3+F) + i(\nu_1 + \nu_2 + \gamma G)], \quad u^{(1)} = \begin{pmatrix} 2(\epsilon + id) \\ p_+ + iq_+ \\ 0 \\ 0 \end{pmatrix}, \quad v^{(1)} = \begin{pmatrix} -\frac{p_- - iq_-}{4(\epsilon + id)(F + iG)} & \frac{1}{2(F + iG)} & 0 & 0 \end{pmatrix} \\
\lambda_2 &= \frac{1}{2} [\gamma(3-F) + i(\nu_1 + \nu_2 - \gamma G)], \quad u^{(2)} = \begin{pmatrix} 2(\epsilon + id) \\ p_- - iq_- \\ 0 \\ 0 \end{pmatrix}, \quad v^{(2)} = \begin{pmatrix} \frac{p_+ + iq_+}{4(\epsilon + id)(F + iG)} & -\frac{1}{2(F + iG)} & 0 & 0 \end{pmatrix} \\
\lambda_3 &= \frac{1}{2} [\gamma(3+F) - i(\nu_1 + \nu_2 + \gamma G)], \quad u^{(3)} = \begin{pmatrix} 0 \\ 0 \\ 2(\epsilon - id) \\ p_+ - iq_+ \end{pmatrix}, \quad v^{(3)} = \begin{pmatrix} 0 & 0 & -\frac{p_- + iq_-}{4(\epsilon - id)(F - iG)} & \frac{1}{2(F - iG)} \end{pmatrix} \\
\lambda_4 &= \frac{1}{2} [\gamma(3-F) - i(\nu_1 + \nu_2 - \gamma G)], \quad u^{(4)} = \begin{pmatrix} 0 \\ 0 \\ 2(\epsilon - id) \\ p_- + iq_- \end{pmatrix}, \quad v^{(4)} = \begin{pmatrix} 0 & 0 & \frac{p_+ - iq_+}{4(\epsilon - id)(F - iG)} & -\frac{1}{2(F - iG)} \end{pmatrix}
\end{aligned} \tag{16}$$

then the  $\sigma$ -matrix is of the form

$$\sigma_{ij}(t) = 2 \sum_{\alpha, \beta \in R} \frac{1 - e^{-(\lambda_\alpha + \lambda_\beta)t}}{\lambda_\alpha + \lambda_\beta} D^{(\alpha, \beta)} u_i^{(\alpha)} u_j^{(\beta)}, \quad D^{(\alpha, \beta)} = \sum_{k, l \in R} v_k^{(\alpha)} D_{kl} v_l^{(\beta)} \tag{17}$$

where  $D$  is the diffusion matrix defined in Eq.(6) in main text. Hence from the literature the full solution to the PDE with respect to the initial condition  $P(\alpha_\mu, \alpha_\mu^*, 0) = \delta^{(2)}(\alpha_1) \delta^{(2)}(\alpha_2)$  reads

$$P(\alpha_\mu, \alpha_\mu^*, t) = \frac{1}{\sqrt{(2\pi)^4 \det[\sigma(t)]}} \exp \left[ -\frac{1}{2} \sum_{i, j \in R} \sigma_{ij}^{-1}(t) x_i x_j \right] \tag{18}$$

where  $R = \{1, 2, 1^*, 2^*\}$  and  $x = \{\alpha_1, \alpha_2, \alpha_1^*, \alpha_2^*\}$ . The expectation value of observable within normal order is

$$\langle (a_1^\dagger)^m (a_2^\dagger)^n a_1^k a_2^l \rangle = \int (\alpha_1^*)^m (\alpha_2^*)^n \alpha_1^k \alpha_2^l P(\alpha_\mu, \alpha_\mu^*, t) d^2 \alpha_1 d^2 \alpha_2 \tag{19}$$

The coefficients  $A_{\dots}$  are

$$\begin{aligned}
A_{11}^{13} &= \frac{1}{F^2 + G^2} \left( \frac{1 - e^{-\gamma(3+F)t}}{3+F} \frac{p_-^2 + q_-^2}{2} + \frac{1 - e^{-\gamma(3-F)t}}{3-F} \frac{p_+^2 + q_+^2}{2} - \operatorname{Re} \left[ \frac{1 - e^{-\gamma(3+iG)t}}{3+iG} (p_+ - iq_+)(p_- - iq_-) \right] \right) \\
A_{22}^{13} &= \frac{2(\epsilon^2 + d^2)}{F^2 + G^2} \left( \frac{1 - e^{-\gamma(3+F)t}}{3+F} + \frac{1 - e^{-\gamma(3-F)t}}{3-F} - 2\operatorname{Re} \left[ \frac{1 - e^{-\gamma(3+iG)t}}{3+iG} \right] \right) \\
A_{1221}^{13} &= -\frac{\epsilon(\epsilon^2 + d^2)}{F^2 + G^2} \left( \frac{1 - e^{-\gamma(3+F)t}}{3+F} \operatorname{Re} \left[ \frac{p_- - iq_-}{\epsilon + id} \right] + \frac{1 - e^{-\gamma(3-F)t}}{3-F} \operatorname{Re} \left[ \frac{p_+ + iq_+}{\epsilon + id} \right] \right. \\
&\quad \left. - \operatorname{Re} \left[ \frac{1 - e^{-\gamma(3+iG)t}}{3+iG} \left( \frac{p_+ - iq_+}{\epsilon - id} + \frac{p_- - iq_-}{\epsilon + id} \right) \right] \right) \\
A_{11}^{14} &= \frac{\epsilon + id}{4(\epsilon^2 + d^2)(F^2 + G^2)} \left( \frac{1 - e^{-\gamma(3+F)t}}{3+F} (p_-^2 + q_-^2)(p_+ - iq_+) + \frac{1 - e^{-\gamma(3-F)t}}{3-F} (p_+^2 + q_+^2)(p_- + iq_-) \right. \\
&\quad \left. - \frac{1 - e^{-\gamma(3+iG)t}}{3+iG} (p_-^2 + q_-^2)(p_+ - iq_+) - \frac{1 - e^{-\gamma(3-iG)t}}{3-iG} (p_+^2 + q_+^2)(p_- + iq_-) \right) \\
A_{22}^{14} &= \frac{\epsilon + id}{F^2 + G^2} \left( \left[ \frac{1 - e^{-\gamma(3+F)t}}{3+F} - \frac{1 - e^{-\gamma(3-iG)t}}{3-iG} \right] (p_+ - iq_+) + \left[ \frac{1 - e^{-\gamma(3-F)t}}{3-F} - \frac{1 - e^{-\gamma(3+iG)t}}{3+iG} \right] (p_- + iq_-) \right) \\
A_{1221}^{14} &= -\frac{\epsilon + id}{2(F^2 + G^2)} \left( \frac{1 - e^{-\gamma(3+F)t}}{3+F} \operatorname{Re} \left[ \frac{p_- - iq_-}{\epsilon + id} \right] (p_+ - iq_+) + \frac{1 - e^{-\gamma(3-F)t}}{3-F} \operatorname{Re} \left[ \frac{p_+ + iq_+}{\epsilon + id} \right] (p_- + iq_-) \right. \\
&\quad \left. - \frac{1 - e^{-\gamma(3+iG)t}}{3+iG} \left( \frac{p_+ - iq_+}{\epsilon - id} + \frac{p_- - iq_-}{\epsilon + id} \right) (p_- + iq_-) - \frac{1 - e^{-\gamma(3-iG)t}}{3-iG} \left( \frac{p_+ + iq_+}{\epsilon + id} + \frac{p_- + iq_-}{\epsilon - id} \right) (p_+ - iq_+) \right) \\
A_{11}^{24} &= \frac{(p_+^2 + q_+^2)(p_-^2 + q_-^2)}{8(\epsilon^2 + d^2)(F^2 + G^2)} \left( \frac{1 - e^{-\gamma(3+F)t}}{3+F} + \frac{1 - e^{-\gamma(3-F)t}}{3-F} - 2\operatorname{Re} \left[ \frac{1 - e^{-\gamma(3+iG)t}}{3+iG} \right] \right) \\
A_{22}^{24} &= \frac{1}{2(F^2 + G^2)} \left( \frac{1 - e^{-\gamma(3+F)t}}{3+F} (p_+^2 + q_+^2) + \frac{1 - e^{-\gamma(3-F)t}}{3-F} (p_-^2 + q_-^2) - 2\operatorname{Re} \left[ \frac{1 - e^{-\gamma(3+iG)t}}{3+iG} (p_+ + iq_+)(p_- + iq_-) \right] \right) \\
A_{1221}^{24} &= -\frac{\epsilon}{4(F^2 + G^2)} \left( \frac{1 - e^{-\gamma(3+F)t}}{3+F} \operatorname{Re} \left[ \frac{p_- - iq_-}{\epsilon + id} \right] (p_+^2 + q_+^2) + \frac{1 - e^{-\gamma(3-F)t}}{3-F} \operatorname{Re} \left[ \frac{p_+ + iq_+}{\epsilon + id} \right] (p_-^2 + q_-^2) \right. \\
&\quad \left. - \operatorname{Re} \left[ \frac{1 - e^{-\gamma(3+iG)t}}{3+iG} \left( \frac{p_+ - iq_+}{\epsilon - id} + \frac{p_- - iq_-}{\epsilon + id} \right) (p_+ + iq_+)(p_- + iq_-) \right] \right)
\end{aligned} \tag{20}$$

The expressions of  $\mathcal{I}_{\dots}$  in Eq.(18) in main text are

$$\begin{aligned}
\mathcal{I}_{11}^{13} &= -\frac{1}{2(F^2 + G^2)} \left( \frac{p_-^2 + q_-^2}{(3 + F)^2} + \frac{p_+^2 + q_+^2}{(3 - F)^2} - 2\text{Re} \left[ \frac{(p_+ - iq_+)(p_- - iq_-)}{(3 + iG)^2} \right] \right) \\
\mathcal{I}_{22}^{13} &= -\frac{2(\epsilon^2 + d^2)}{F^2 + G^2} \left[ \frac{1}{(3 + F)^2} + \frac{1}{(3 - F)^2} - \frac{18 - 2G^2}{(9 + G^2)^2} \right] \\
\mathcal{I}_{1221}^{13} &= \frac{\epsilon(\epsilon^2 + d^2)}{F^2 + G^2} \left( \frac{\text{Re} \left[ \frac{p_- - iq_-}{\epsilon + id} \right]}{(3 + F)^2} + \frac{\text{Re} \left[ \frac{p_+ + iq_+}{\epsilon + id} \right]}{(3 - F)^2} - \text{Re} \left[ \frac{\frac{p_+ - iq_+}{\epsilon - id} - \frac{p_- - iq_-}{\epsilon + id}}{(3 + iG)^2} \right] \right) \\
\mathcal{I}_{11}^{14} &= -\frac{1}{4(\epsilon - id)(F^2 + G^2)} \left[ (p_-^2 + q_-^2)(p_+ - iq_+) \left( \frac{1}{(3 + F)^2} - \frac{1}{(3 + iG)^2} \right) \right. \\
&\quad \left. + (p_+^2 + q_+^2)(p_- + iq_-) \left( \frac{1}{(3 - F)^2} - \frac{1}{(3 - iG)^2} \right) \right] \\
\mathcal{I}_{22}^{14} &= -\frac{\epsilon + id}{F^2 + G^2} \left[ \left( \frac{1}{(3 + F)^2} - \frac{1}{(3 - iG)^2} \right) (p_+ - iq_+) + \left( \frac{1}{(3 - F)^2} - \frac{1}{(3 + iG)^2} \right) (p_- + iq_-) \right] \\
\mathcal{A}_{1221}^{14} &= \frac{\epsilon + id}{2(F^2 + G^2)} \left( \frac{p_+ - iq_+}{(3 + F)^2} \text{Re} \left[ \frac{p_- - iq_-}{\epsilon + id} \right] + \frac{p_- + iq_-}{(3 - F)^2} \text{Re} \left[ \frac{p_+ + iq_+}{\epsilon + id} \right] \right. \\
&\quad \left. - \frac{p_- + iq_-}{(3 + iG)^2} \left( \frac{p_+ - iq_+}{\epsilon - id} + \frac{p_- - iq_-}{\epsilon + id} \right) - \frac{p_+ - iq_+}{(3 - iG)^2} \left( \frac{p_+ + iq_+}{\epsilon + id} + \frac{p_- + iq_-}{\epsilon - id} \right) \right) \\
\mathcal{I}_{11}^{24} &= -\frac{(p_+^2 + q_+^2)(p_-^2 + q_-^2)}{8(\epsilon^2 + d^2)(F^2 + G^2)} \left[ \frac{1}{(3 + F)^2} + \frac{1}{(3 - F)^2} - \frac{18 - 2G^2}{(9 + G^2)^2} \right] \\
\mathcal{I}_{22}^{24} &= -\frac{1}{2(F^2 + G^2)} \left( \frac{p_+^2 + q_+^2}{(3 + F)^2} + \frac{p_-^2 + q_-^2}{(3 - F)^2} - 2\text{Re} \left[ \frac{(p_+ + iq_+)(p_- + iq_-)}{(3 + iG)^2} \right] \right) \\
\mathcal{I}_{1221}^{24} &= \frac{\epsilon}{4(F^2 + G^2)} \left( \frac{p_+^2 + q_+^2}{(3 + F)^2} \text{Re} \left[ \frac{p_- - iq_-}{\epsilon + id} \right] + \frac{p_-^2 + q_-^2}{(3 - F)^2} \text{Re} \left[ \frac{p_+ + iq_+}{\epsilon + id} \right] \right. \\
&\quad \left. - \text{Re} \left[ \frac{(p_+ + iq_+)(p_- + iq_-)}{(3 + iG)^2} \left( \frac{p_+ - iq_+}{\epsilon - id} + \frac{p_- - iq_-}{\epsilon + id} \right) \right] \right)
\end{aligned} \tag{21}$$
